# Supplementary material for: Metabolomics by UHPLC-Q-TOF Reveals Host Tree-Dependent Phytochemical Variation in Viscum album L
Source: MDPI journal article supplement (doi:10.3390/plants10081726), 2021-08-20
Supplement: s1 [file s1]

## Supplementary Material

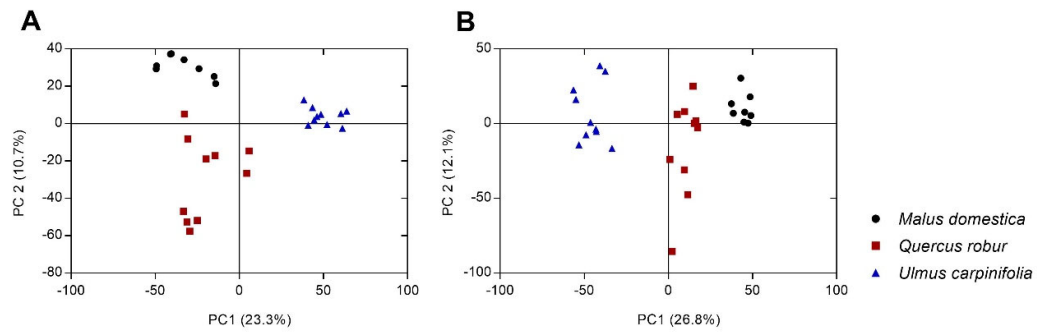

**Figure S1.** PCA score plot for first and second principal components (PC) showing the discrimination between *V. album ssp. album* from different host trees. Samples harvested in 2016 (A) and in 2017 (B).

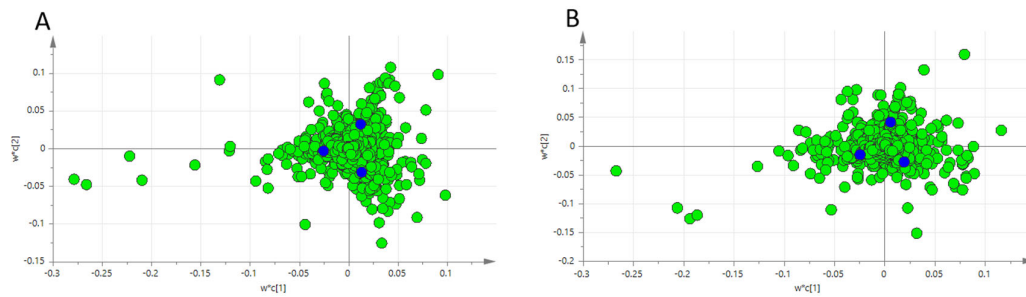

**Figure S2.** PLS-DA loadings plots for 2016 (A) and 2017 (B).
